# Supplementary material for: Green Synthesis of Silver Nanoparticles Using Randia aculeata L. Cell Culture Extracts, Characterization, and Evaluation of Antibacterial and Antiproliferative Activity
Source: MDPI journal article supplement (doi:10.3390/nano12234184), 2022-11-25
Supplement: s1 [file s1]

## Supplementary Materials

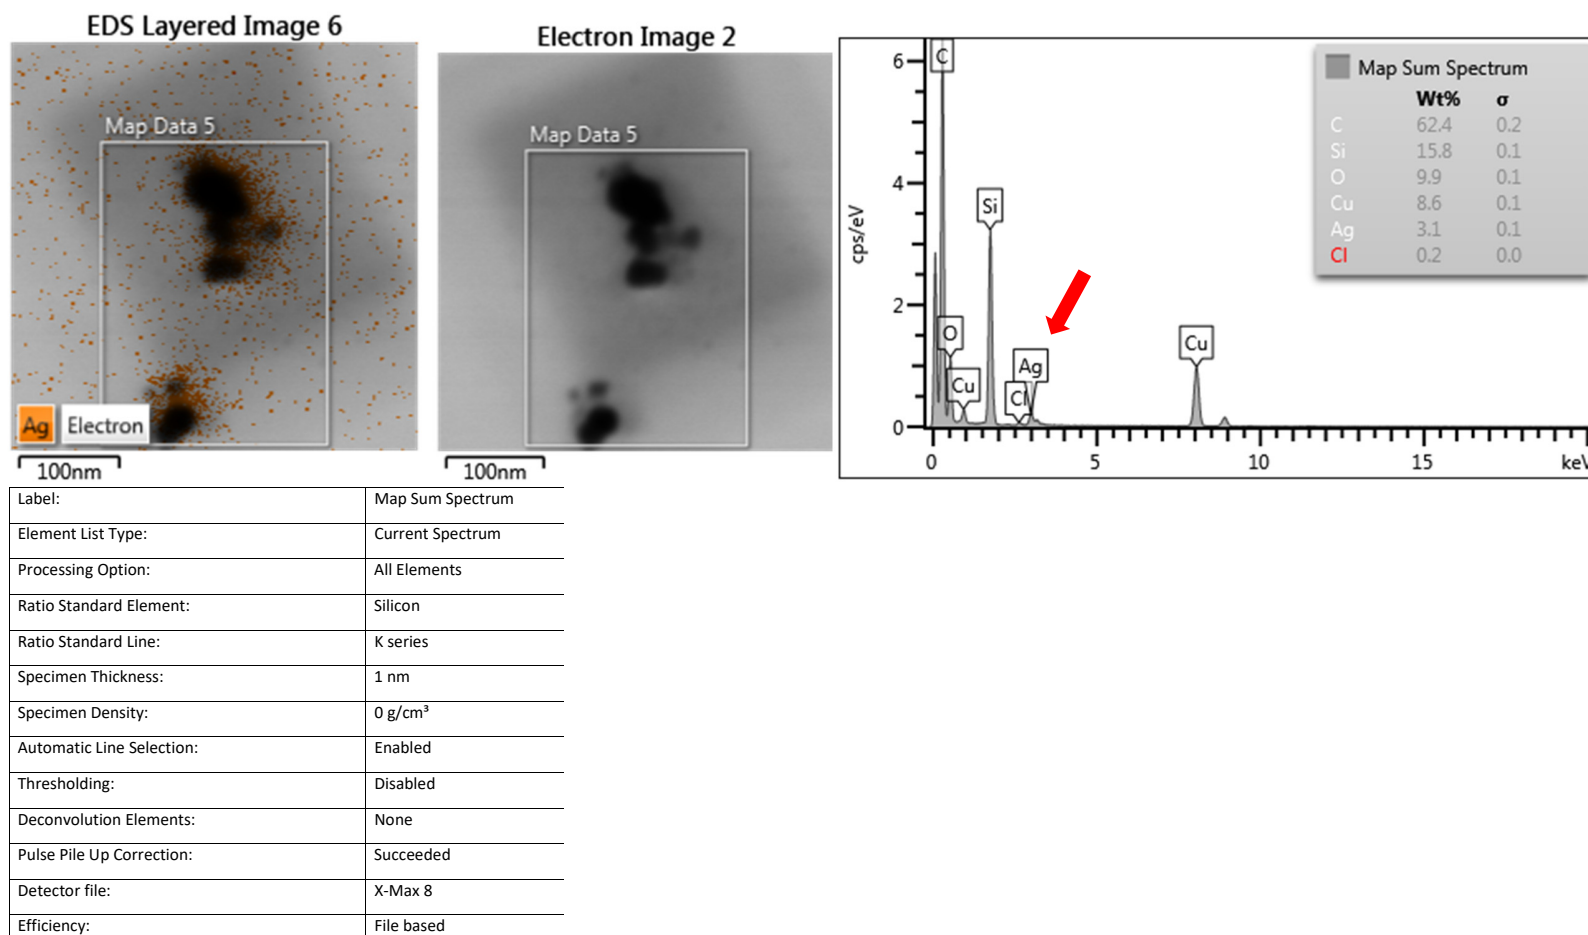

**Figure S1.** Elemental analysis by EDX of a sample of AgNPs indicating the presence of silver and other elements corresponding to the composition of the grid and the sample holder of the TEM system.

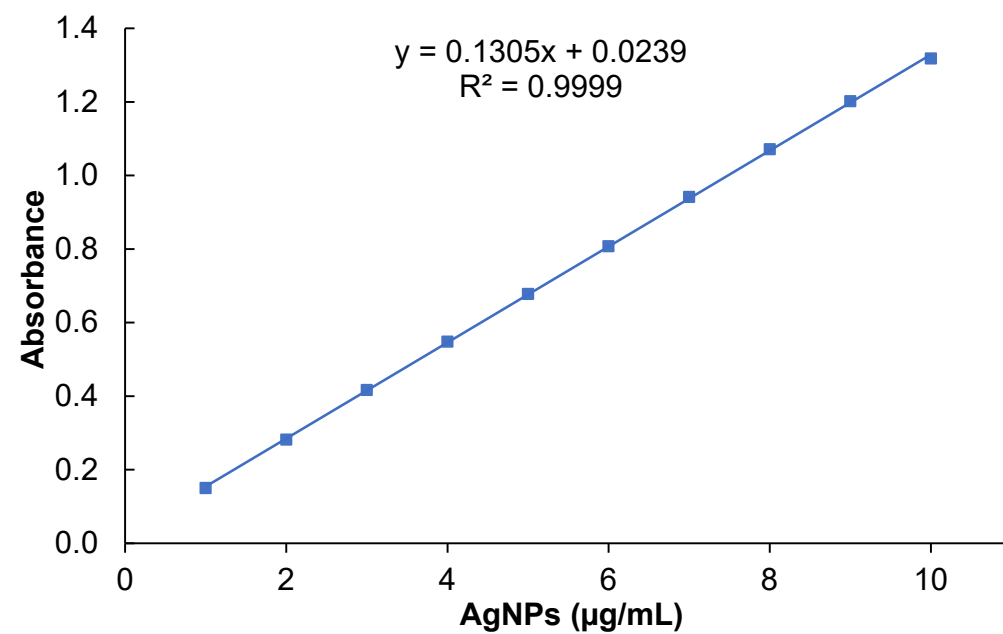

**Figure S2.** Calibration curve with 10 nm commercial AgNPs at an absorbance of 395 nm using a UV–Vis spectrophotometer.

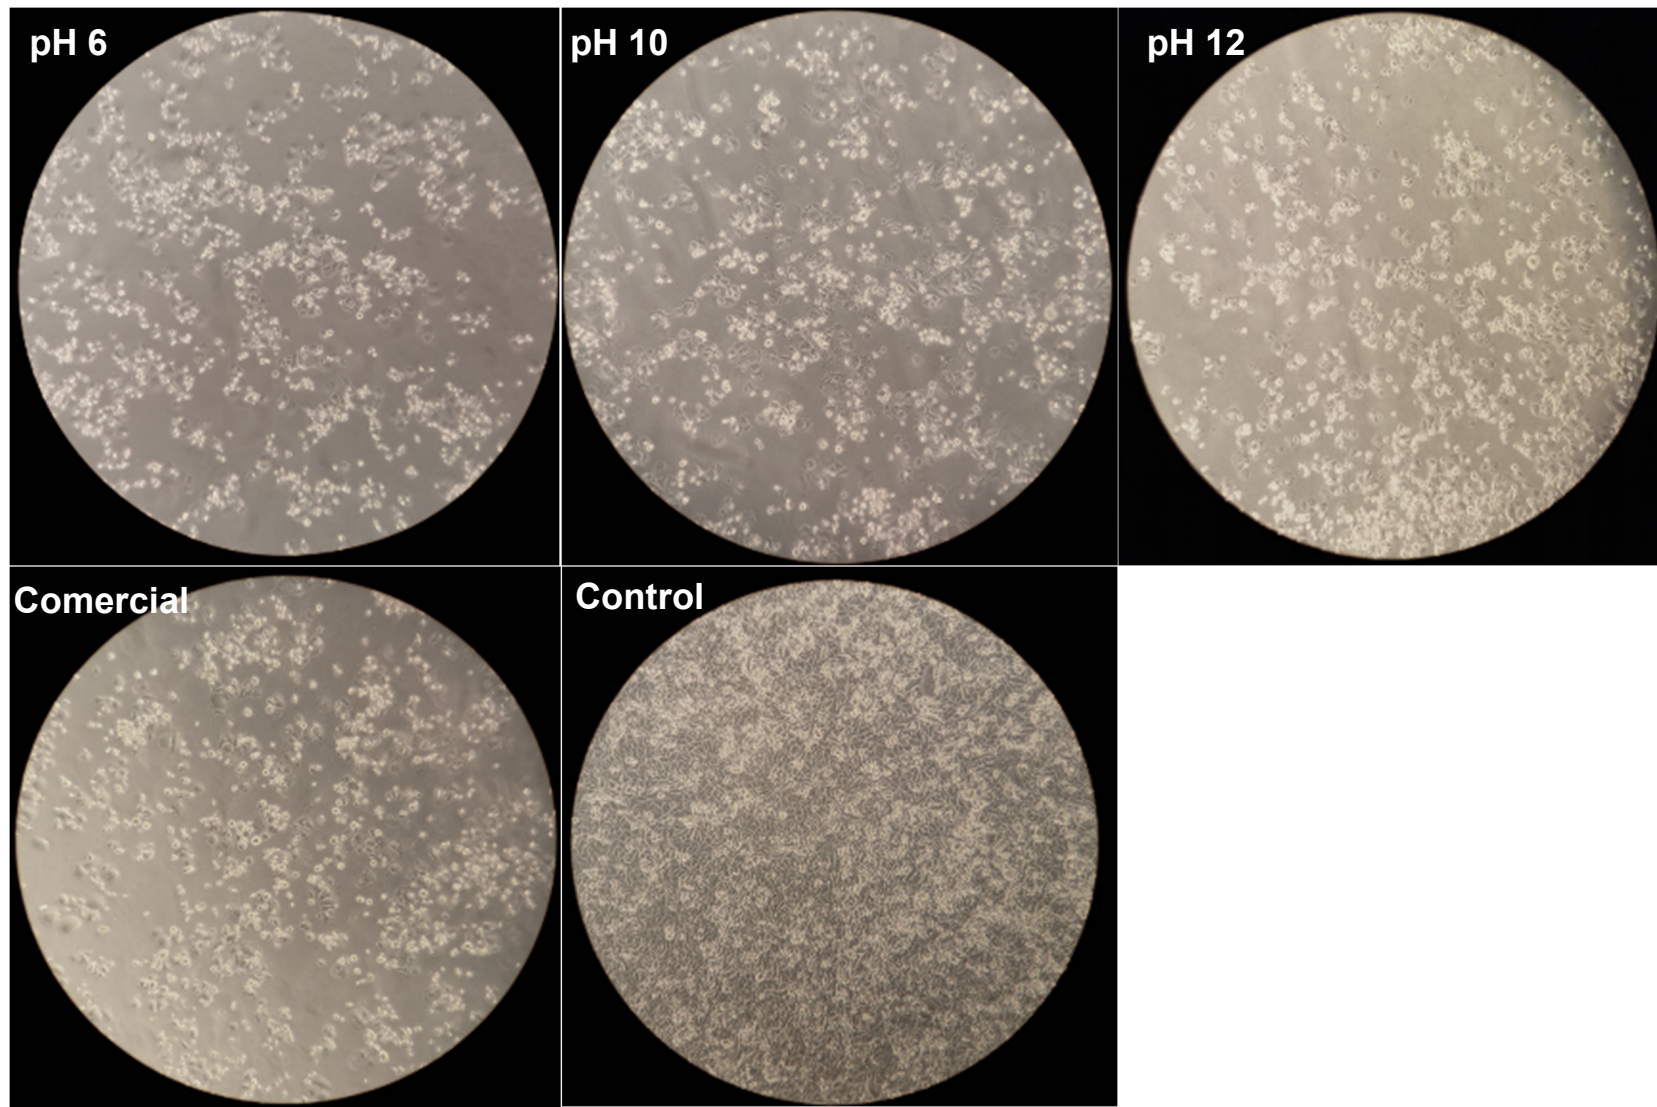

**Figure S3.** Microscopic images of the effect of AgNPs obtained at different pH and evaluated in the Hep3B cell line compared with commercial AgNPs (Sigma) and a control (DMSO).
